# Supplementary material for: A cellular/intranuclear dual-targeting nanoplatform based on gold nanostar for accurate tumor photothermal therapy
Source: Royal Society of Chemistry journal article supplement (doi:10.1039/c8tb00087e), 2018-01-01
Supplement: c8tb00087e1.pdf [file c8tb00087e1.pdf]

**Electronic Supplementary Information**  
*of*  
**A cellular/intranuclear dual-targeting nanoplatfom based on gold  
nanostar for accurate tumor photothermal therapy**

*Si Chen,<sup>a</sup> Jinxuan Fan,<sup>b</sup> Wenxiu Qiu,<sup>b</sup> Fan Liu,<sup>a</sup> Guoping Yan,<sup>\*a</sup> Xuan Zeng<sup>\*b</sup> and Xianzheng  
Zhang<sup>\*b</sup>*

a. School of Material Science and Engineering, Wuhan Institute of Technology, Wuhan 430205, PR  
China.

b. Key Laboratory of Biomedical Polymers of Ministry of Education & Department of Chemistry,  
Wuhan University, Wuhan 430072, PR China.

\* Corresponding Authors. guopyan2006@163.com; zeng\_xuan@163.com; xz-zhang@whu.edu.cn

**Table S1.** Hydrodynamic diameter, zeta potential and longitudinal SPR peak of the GNS based nanoplatfoms after being modified step-by-step.

| <b>Sample</b> | <b>Hydrodynamic diameter (nm)</b> | <b>Zeta potential (mV)</b> | <b>longitudinal SPR peak (nm)</b> |
|---------------|-----------------------------------|----------------------------|-----------------------------------|
| GNS           | 40.8±0.4                          | -21.3±1.1                  | 741                               |
| GNS-PEG       | 45.3±0.4                          | -10.4±0.9                  | 754                               |
| GNS-NLS       | 72.4±0.7                          | 4.69±0.8                   | 752                               |
| GNS-NLS@HA    | 93.2±0.5                          | -13.5±1.2                  | 749                               |

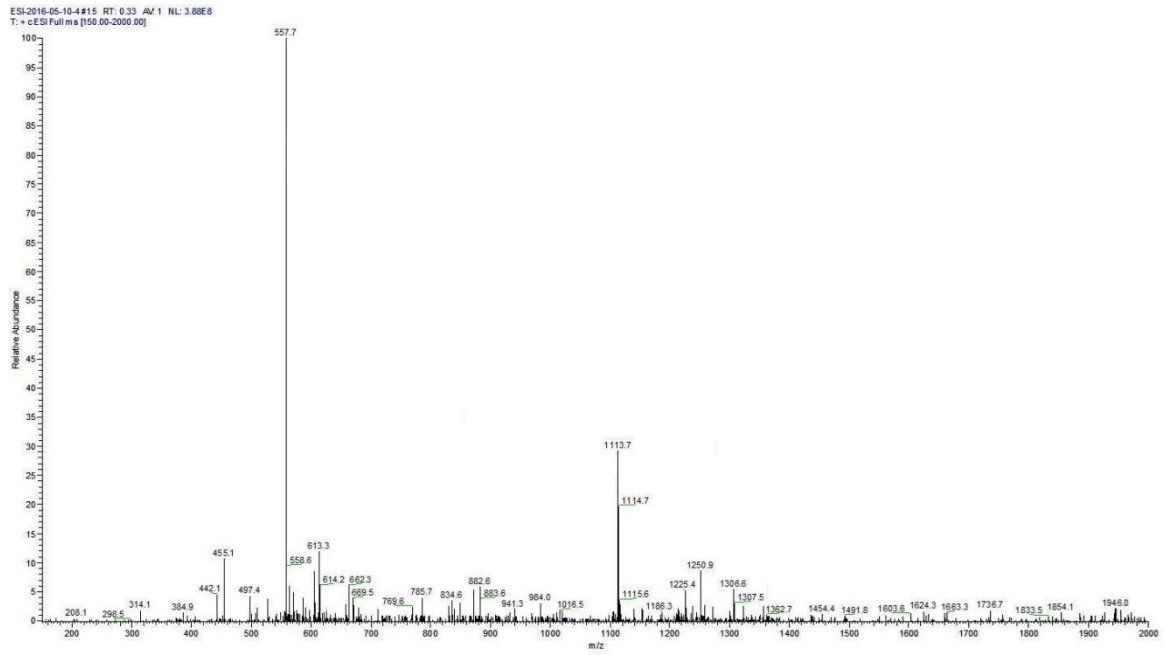

**Figure S1.** ESI-MS of peptide NLS.

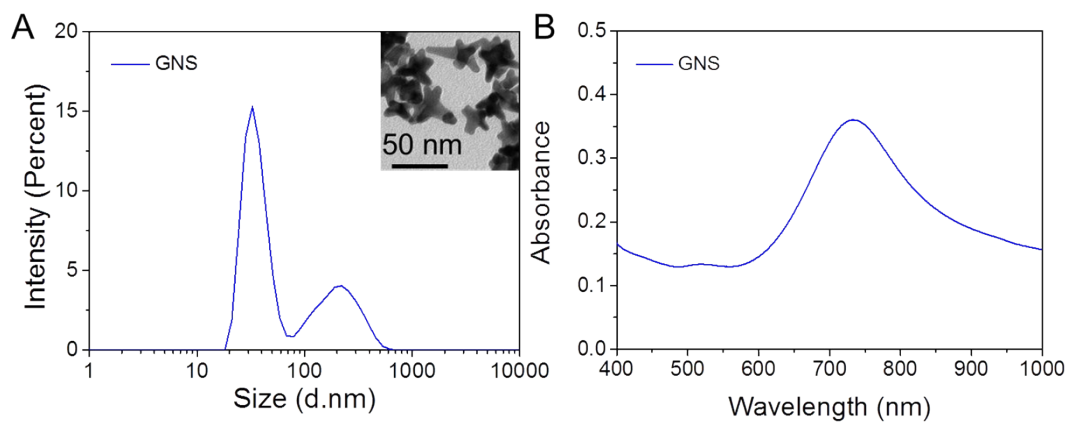

**Figure S2.** (A) Size distribution of GNS in DI water *via* DLS analysis, insert: TEM image of GNS; (B) UV-Vis-NIR absorption spectra of GNS.

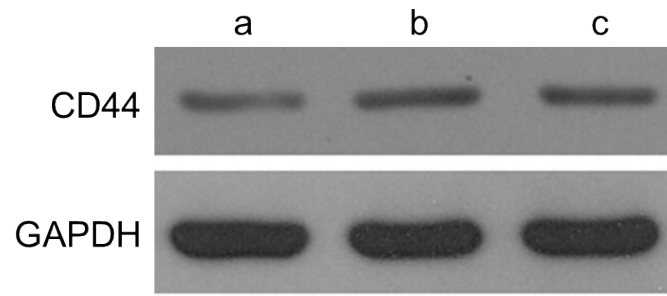

**Figure S3.** CD44 expression in (a) NIH3T3, (B) MCF-7 and (c) 4T1 cells by Western blot analysis.

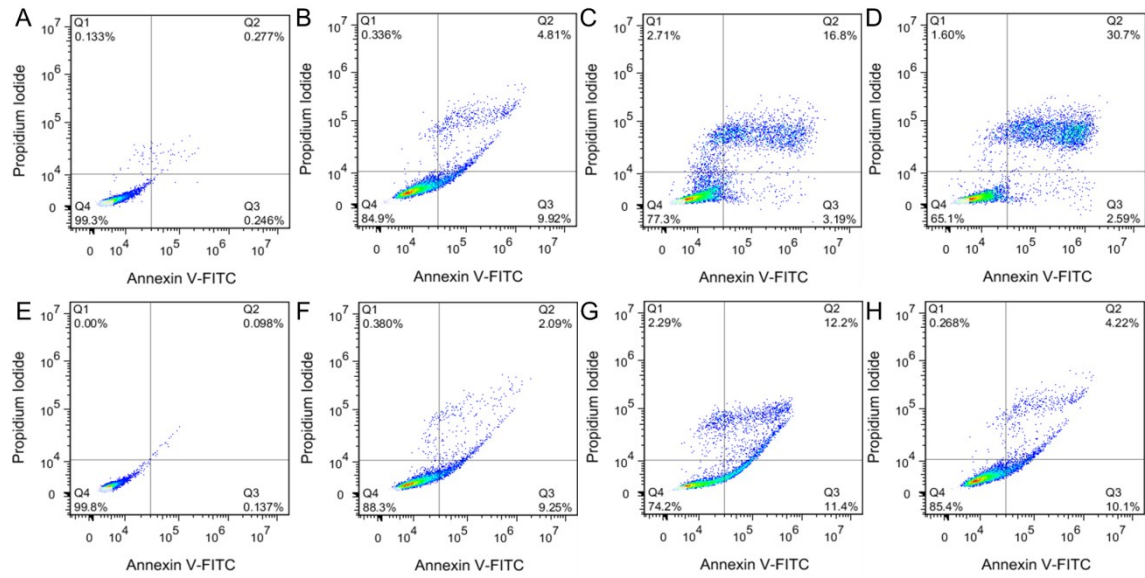

**Figure S4.** Apoptosis and necrosis of 4T1 (A-D) and NIH3T3 (E-H) cells analyzed by flow cytometry. (A, E) Untreated cells (control); (B, F) GNS-PEG+laser; (C, G) GNS-NLS+laser and (D, H) GNS-NLS@HA+laser.

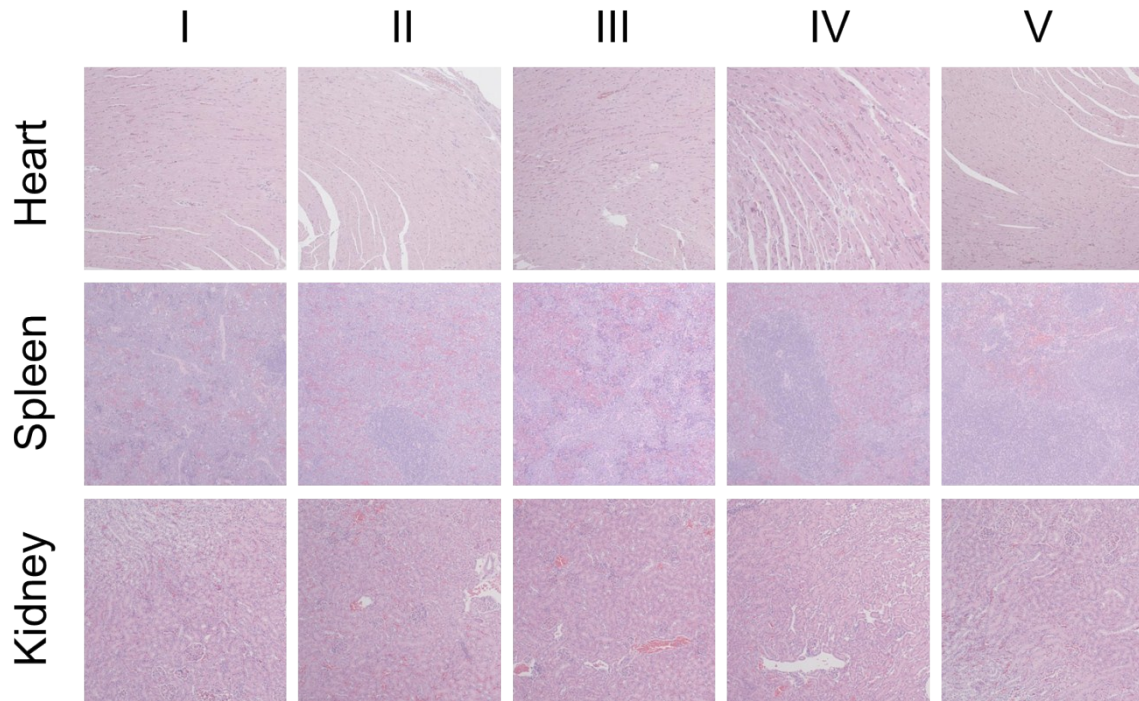

**Figure S5.** H&E staining images of main organs (heart, spleen and kidney) in groups treated with (I) PBS, (II) GNS-NLS@HA, (III) GNS-PEG+laser, (IV) GNS-NLS+laser and (V) GNS-NLS@HA+laser. The magnification was 200 ×.
